# Supplementary material
Source: PubMed Central journal article supplement (PMC518859)
Supplement: pnas_101_38_13951__5.pdf [file pnas_101_38_13951__5.pdf]

**Table 8. Codon usage in *Populus***

---

|     |     |      |      |     |     |      |      |     |     |      |      |     |     |      |      |
|-----|-----|------|------|-----|-----|------|------|-----|-----|------|------|-----|-----|------|------|
| Phe | UUU | 4887 | 1.11 | Ser | UCU | 4047 | 1.60 | Tyr | UAU | 3438 | 1.09 | Cys | UGU | 1709 | 0.99 |
|     | UUC | 3949 | 0.89 |     | UCC | 2298 | 0.91 |     | UAC | 2872 | 0.91 |     | UGC | 1738 | 1.01 |
| Leu | UUA | 1802 | 0.58 |     | UCA | 3348 | 1.32 | TER | UAA | 163  | 0.93 | TER | UGA | 229  | 1.31 |
|     | UUG | 4652 | 1.49 |     | UCG | 952  | 0.38 |     | UAG | 131  | 0.75 | Trp | UGG | 2444 | 1.00 |
|     | CUU | 5016 | 1.61 | Pro | CCU | 4053 | 1.60 | His | CAU | 2605 | 1.16 | Arg | CGU | 1658 | 0.93 |
|     | CUC | 2959 | 0.95 |     | CCC | 1504 | 0.59 |     | CAC | 1903 | 0.84 |     | CGC | 1124 | 0.63 |
|     | CUA | 1639 | 0.53 |     | CCA | 3749 | 1.48 | Gln | CAA | 3545 | 1.00 |     | CGA | 1140 | 0.64 |
|     | CUG | 2640 | 0.85 |     | CCG | 829  | 0.33 |     | CAG | 3535 | 1.00 |     | CGG | 832  | 0.47 |
| Ile | AUU | 5376 | 1.43 | Thr | ACU | 3914 | 1.49 | Asn | AAU | 4499 | 1.12 | Ser | AGU | 2368 | 0.93 |
|     | AUC | 3658 | 0.97 |     | ACC | 2494 | 0.95 |     | AAC | 3554 | 0.88 |     | AGC | 2190 | 0.86 |
|     | AUA | 2270 | 0.60 |     | ACA | 3291 | 1.25 | Lys | AAA | 5878 | 0.79 | Arg | AGA | 2924 | 1.65 |
| Met | AUG | 4820 | 1.00 |     | ACG | 791  | 0.30 |     | AAG | 8974 | 1.21 |     | AGG | 2986 | 1.68 |
| Val | GUU | 6125 | 1.65 | Ala | GCU | 6920 | 1.75 | Asp | GAU | 7492 | 1.37 | Gly | GGU | 4569 | 1.24 |
|     | GUC | 2778 | 0.75 |     | GCC | 3034 | 0.77 |     | GAC | 3483 | 0.63 |     | GGC | 2691 | 0.73 |
|     | GUA | 1839 | 0.50 |     | GCA | 4879 | 1.23 | Glu | GAA | 6253 | 0.96 |     | GGA | 4645 | 1.27 |
|     | GUG | 4063 | 1.10 |     | GCG | 1017 | 0.26 |     | GAG | 6820 | 1.04 |     | GGG | 2778 | 0.76 |

---

Codon usage was calculated from 873 AFC sequences that all showed high homology to an *Arabidopsis* protein throughout its whole length.
